# Supplementary material
Source: PubMed Central journal article supplement (PMC5129703)
Supplement: supp_pp.16.00384_PP2016-00384R2_Supplemental_Figure_S1.pdf [file supp_pp.16.00384_PP2016-00384R2_Supplemental_Figure_S1.pdf]

1 Supplemental Figure S1

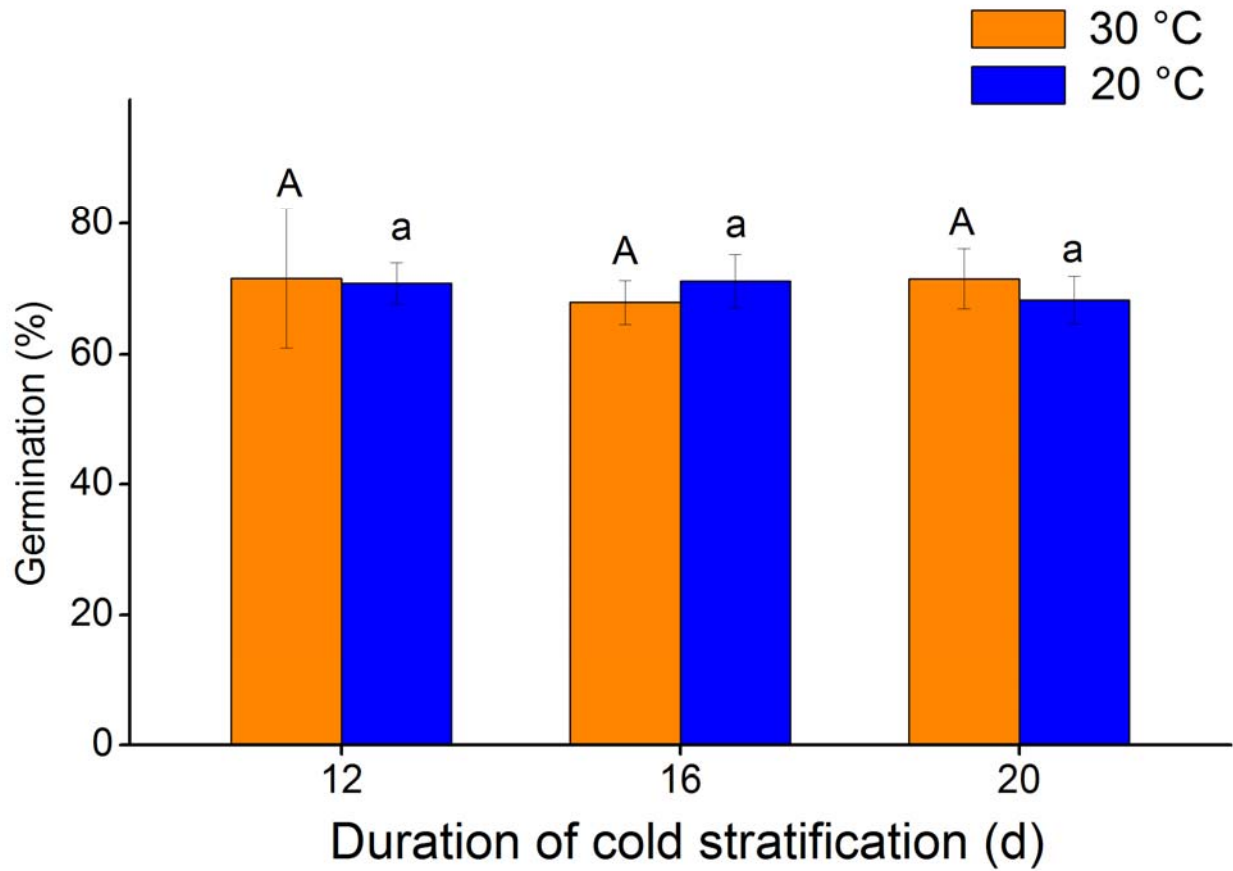

2

3 **Fig. S1 Germination of seeds in eight additional days of cold stratification.**

4 The same uppercase letters indicate no significant difference ( $p > 0.05$ ) among germination  
5 percentages at 30°C. The same lowercase letters indicate no significant differences ( $p > 0.05$ )  
6 among germination percentages at 20°C.

7

8
