# Supplementary material
Source: PubMed Central journal article supplement (PMC5129703)
Supplement: supp_pp.16.00384_PP2016-00384R2_Supplemental_Figure_S3.pdf [file supp_pp.16.00384_PP2016-00384R2_Supplemental_Figure_S3.pdf]

1 **Supplemental Figure S3**

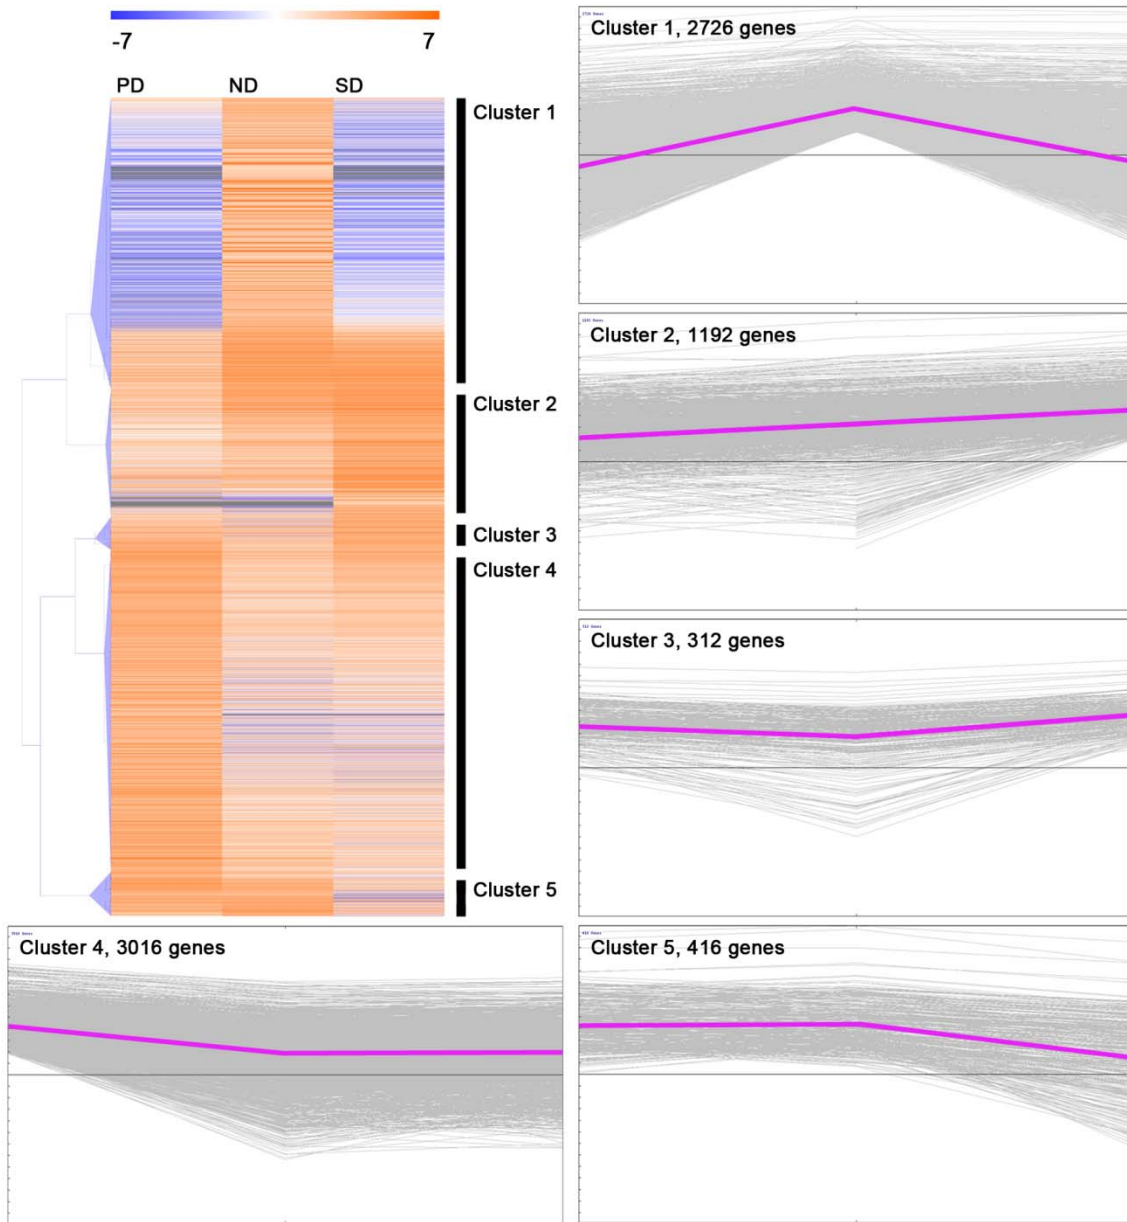

2

3

4 **Fig. S3 Hierarchical cluster analysis of the DEGs and expression patterns of the gene**  
5 **clusters.**

6 Gene expression data were log<sub>2</sub> transformed color-coded (blue: low expression levels; orange:  
7 high expression levels). PD, primary dormant seeds; ND, non-dormant seeds; SD, secondary  
8 dormant seeds.
