# Supplementary material
Source: PubMed Central journal article supplement (PMC5129703)
Supplement: supp_pp.16.00384_PP2016-00384R2_Supplemental_Figure_S5.pdf [file supp_pp.16.00384_PP2016-00384R2_Supplemental_Figure_S5.pdf]

1 **Supplemental Figure S5**

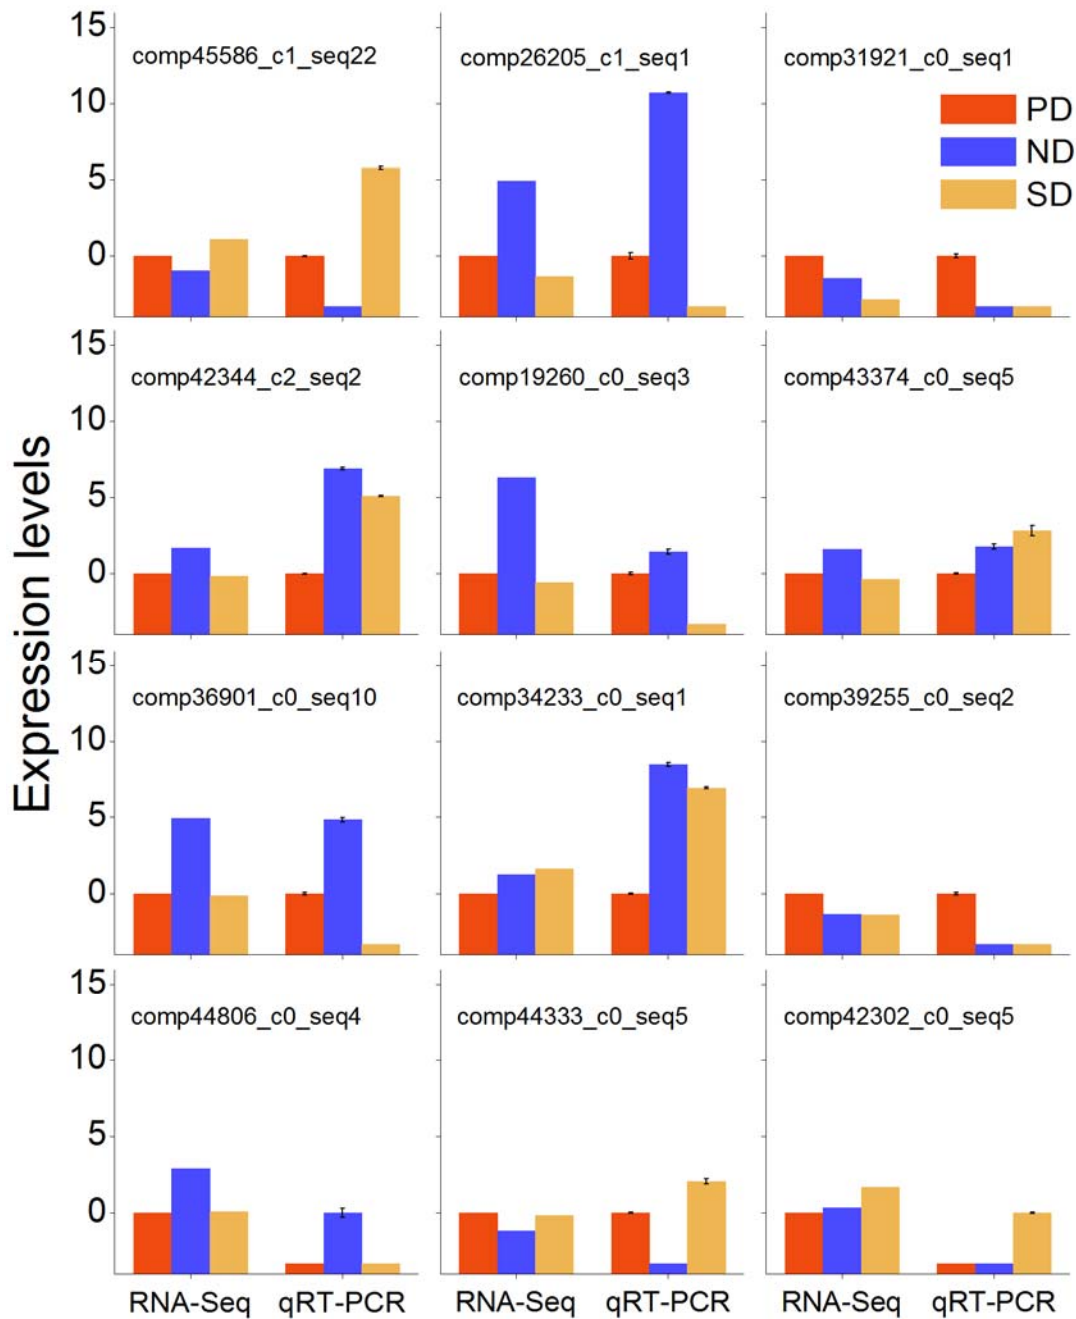

2

3 **Fig. S5 Comparison of gene expression levels detected by RNA-Seq versus qRT-PCR.**

4 Values of expression levels (RPKM) by RNA-seq were standardized, with the value for primary  
 5 dormant seeds set to 1. Expression levels of genes detected by qRT-PCR were calculated using  
 6 the  $2^{-\Delta\Delta C_t}$  method. All data were  $\log_2$  transformed. PD, primary dormant seeds; ND, non-dormant  
 7 seeds; SD, secondary dormant seeds.
