# Supplementary material
Source: PubMed Central journal article supplement (PMC5129703)
Supplement: supp_pp.16.00384_PP2016-00384R2_Supplemental_Figure_S6.pdf [file supp_pp.16.00384_PP2016-00384R2_Supplemental_Figure_S6.pdf]

1 **Supplemental Figure S6**

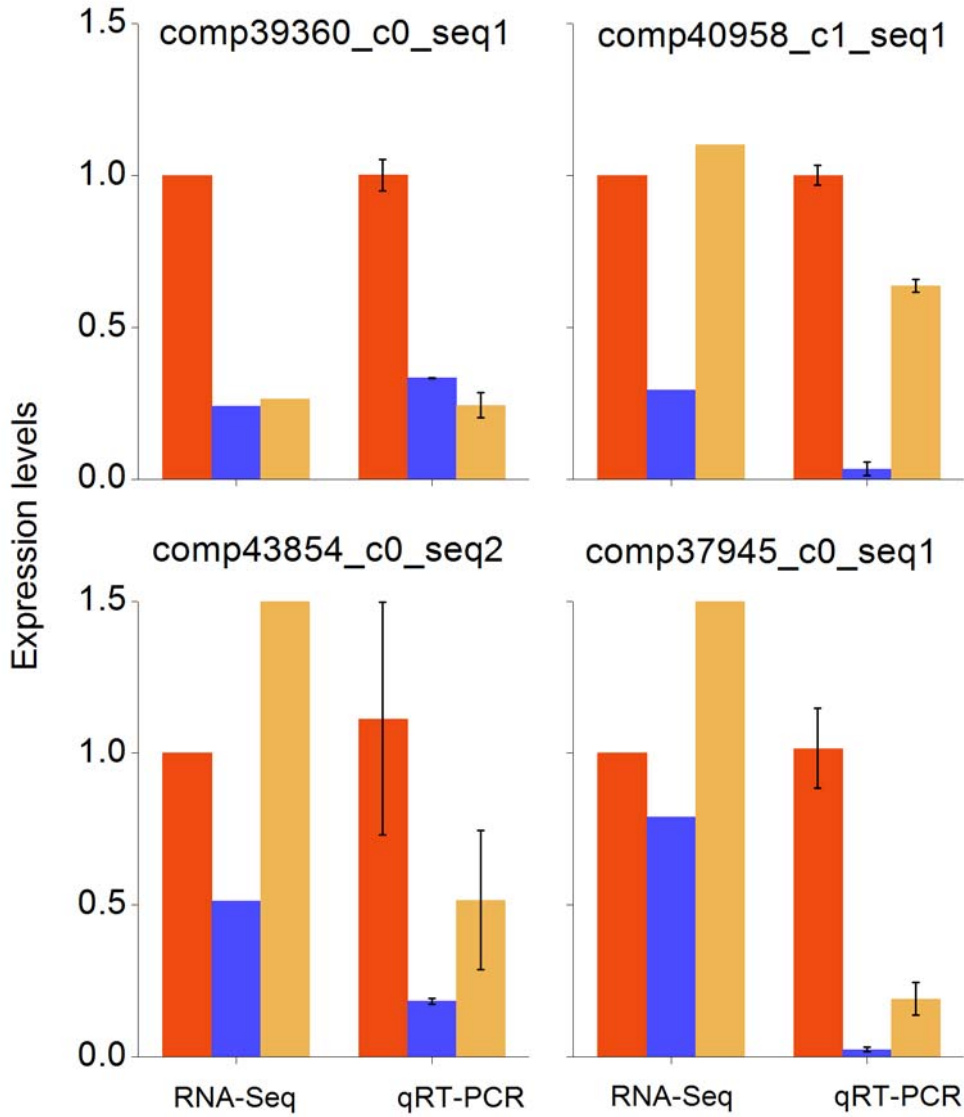

2

3 **Fig. S6 qRT-PCR for GA and ABA associated genes.**

4 Values of expression levels (RPKM) by RNA-seq were standardized, with the value for primary  
5 dormant seeds set to 1. Expression levels of genes detected by qRT-PCR were calculated using  
6 the  $2^{-\Delta\Delta C_t}$  method. PD, primary dormant seeds; ND, non-dormant seeds; SD, secondary dormant  
7 seeds.

8
