# Supplementary material
Source: PubMed Central journal article supplement (PMC5129703)
Supplement: supp_pp.16.00384_PP2016-00384R2_Supplemental_Figure_S7.pdf [file supp_pp.16.00384_PP2016-00384R2_Supplemental_Figure_S7.pdf]

1 Supplemental Figure S7

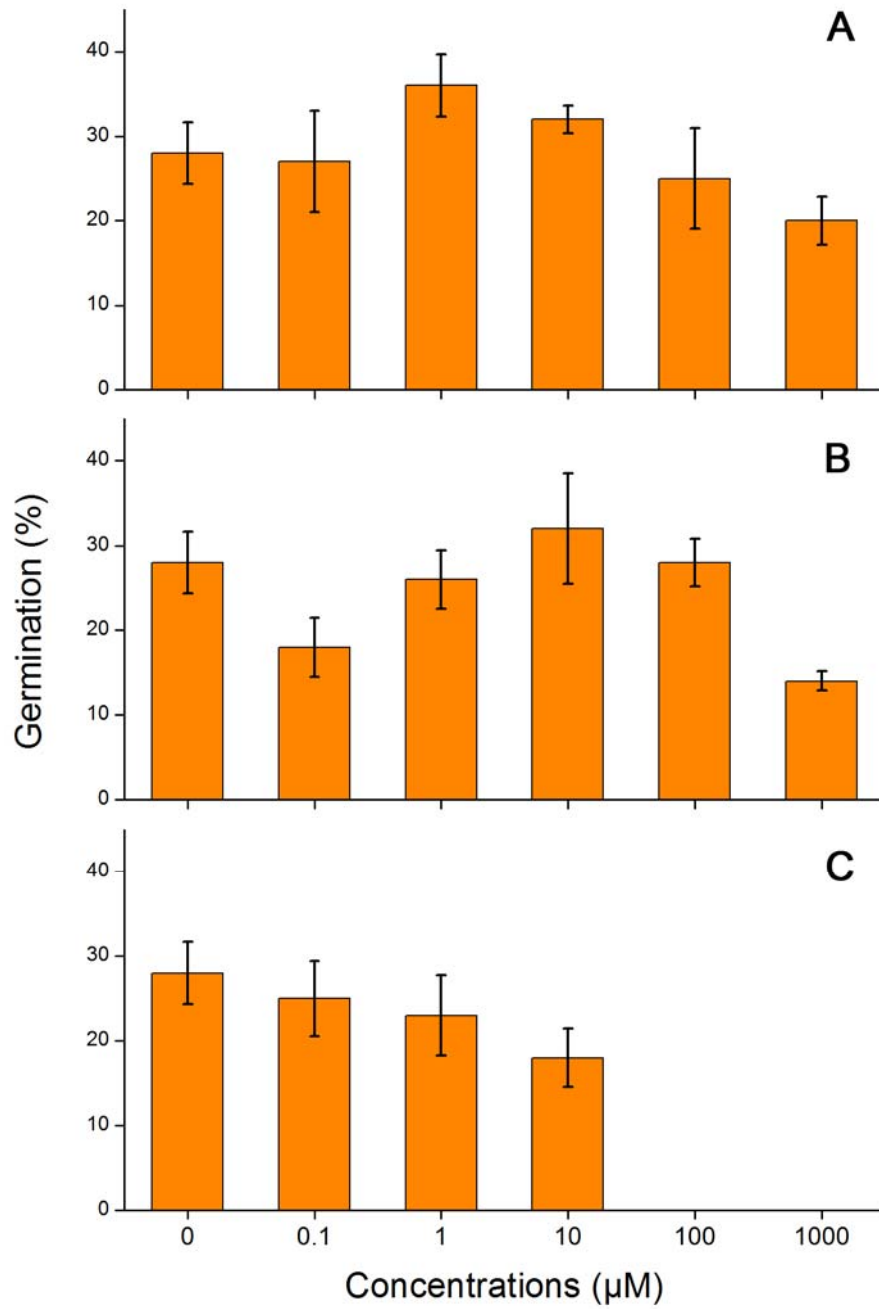

2

3 Fig. S7 Germination of *C. lanceolata* seeds in GA<sub>3</sub> (A), GA<sub>4+7</sub> (B), and ABA (C) solutions.
