# Supplementary material
Source: PubMed Central journal article supplement (PMC5129703)
Supplement: supp_pp.16.00384_PP2016-00384R2_Supplemental_Figure_S9.pdf [file supp_pp.16.00384_PP2016-00384R2_Supplemental_Figure_S9.pdf]

1 **Supplemental Figure S9**

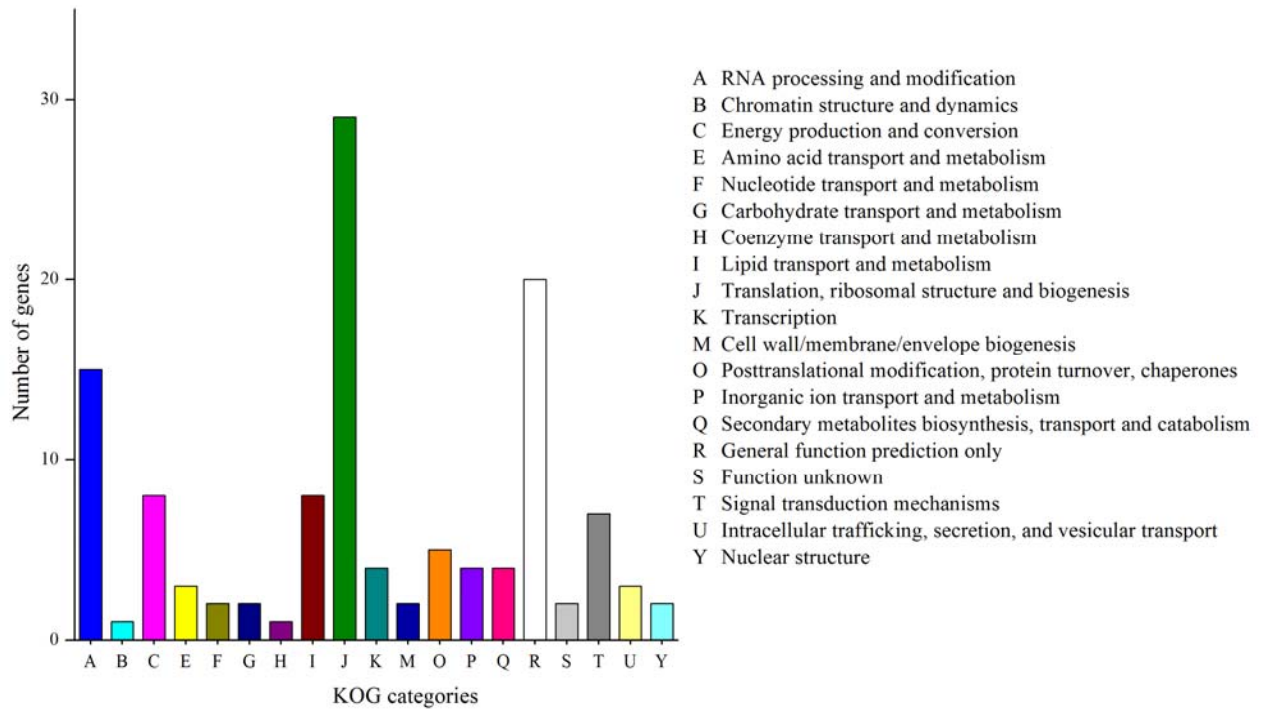

2  
 3 **Fig. S9 Eukaryotic Ortholog Groups (KOG) categories of the 269 DEGs showing opposite**  
 4 **expression patterns in capped and uncapped forms.**

5
