# Supplementary material
Source: PubMed Central journal article supplement (PMC5129703)
Supplement: supp_pp.16.00384_PP2016-00384R2_Supplemental_Table_S2.pdf [file supp_pp.16.00384_PP2016-00384R2_Supplemental_Table_S2.pdf]

1 **Table S2** Summary of gene annotation for the *Cunninghamia lanceolata* transcriptome.

|            | Number of annotated genes | Percentage of annotated genes |
|------------|---------------------------|-------------------------------|
| Swiss-Prot | 25880                     | 40.32                         |
| NR         | 36398                     | 56.70                         |
| Pfam       | 31740                     | 49.45                         |
| GO         | 23173                     | 36.10                         |
| KEGG       | 18338                     | 28.57                         |
| KOG        | 22327                     | 34.78                         |

2

3
