# Supplementary material
Source: PubMed Central journal article supplement (PMC5129703)
Supplement: supp_pp.16.00384_PP2016-00384R2_Supplemental_Table_S8.pdf [file supp_pp.16.00384_PP2016-00384R2_Supplemental_Table_S8.pdf]

1 **Table S8** Differentially expressed genes regulating mRNA degradation.

| Gene               | Annotation | Expression levels (RPKM) |             |             | PD/ND       |            | PD/SD       |            |
|--------------------|------------|--------------------------|-------------|-------------|-------------|------------|-------------|------------|
|                    |            | PD                       | ND          | SD          | Fold-change | P value    | Fold-change | P value    |
| comp42299_c1_seq11 | XRN3       | 66.71803133              | 14.74967046 | 13.08860099 | 2.18        | 5.5456E-10 | 2.35        | 2.2904E-10 |
| comp42299_c1_seq5  | XRN3       | 41.30596923              | 9.136439336 | 8.52941357  | 2.18        | 1.0625E-06 | 2.28        | 9.1381E-07 |
| comp42299_c1_seq9  | XRN3       | 47.69636005              | 10.57271103 | 10.04683055 | 2.178       | 1.6081E-07 | 2.25        | 1.5941E-07 |
| comp43532_c7_seq1  | CCR4-NOT   | 9.289008249              | 2.099669407 | 2.836501877 | 2.15        | 0.021635   | 1.71        | 0.047248   |
| comp45567_c0_seq1  | EXOSC10    | 12.33175518              | 3.014819464 | 2.288937101 | 2.03        | 0.010132   | 2.43        | 0.005592   |

2 Note: Values for fold-changes were log<sub>2</sub> transformed.

3
