# Supplementary material
Source: PubMed Central journal article supplement (PMC5129703)
Supplement: supp_pp.16.00384_PP2016-00384R2_Supplemental_Table_S9.pdf [file supp_pp.16.00384_PP2016-00384R2_Supplemental_Table_S9.pdf]

## Primary dormancy release

## Secondary dormancy induction

| Decreased expression in u |
|---------------------------|---------------------------|---------------------------|---------------------------|
| comp34984_c0_seq1         | comp30269_c0_seq1         | comp39819_c0_seq2         | comp35885_c0_seq5         |
| comp38685_c0_seq1         | comp44806_c0_seq3         | comp45306_c1_seq2         | comp30846_c0_seq1         |
| comp34879_c2_seq1         | comp44806_c0_seq1         | comp45677_c0_seq5         | comp32450_c0_seq1         |
| comp34970_c4_seq2         | comp44806_c0_seq2         | comp43526_c0_seq2         | comp45376_c0_seq10        |
| comp40445_c29_seq1        | comp44806_c0_seq4         | comp45687_c1_seq4         | comp43896_c0_seq1         |
| comp44658_c0_seq5         | comp31997_c0_seq1         | comp45677_c0_seq1         | comp50809_c0_seq1         |
| comp34970_c2_seq1         | comp38691_c1_seq1         | comp42070_c1_seq4         | comp43896_c0_seq4         |
| comp44658_c0_seq4         | comp32730_c0_seq1         | comp56522_c0_seq1         | comp38356_c2_seq1         |
| comp44658_c0_seq1         | comp42299_c1_seq7         | comp43978_c0_seq14        | comp44992_c0_seq78        |
| comp35110_c0_seq1         | comp32914_c1_seq1         | comp45583_c0_seq3         | comp11353_c0_seq1         |
| comp34843_c0_seq3         | comp26521_c0_seq1         | comp43978_c0_seq18        | comp23354_c0_seq2         |
| comp34843_c0_seq1         | comp52610_c0_seq1         | comp43978_c0_seq11        | comp36264_c0_seq1         |
| comp34843_c0_seq2         | comp27038_c0_seq1         | comp32528_c0_seq2         | comp45004_c0_seq11        |
| comp43294_c2_seq7         | comp41348_c0_seq18        | comp26890_c0_seq1         | comp44948_c1_seq12        |
| comp43294_c2_seq3         | comp14918_c0_seq1         | comp34970_c4_seq6         | comp37480_c0_seq1         |
| comp40445_c9_seq1         | comp43304_c0_seq1         | comp40445_c15_seq2        | comp41685_c0_seq1         |
| comp45576_c1_seq15        | comp45381_c0_seq15        | comp43978_c0_seq8         | comp43686_c0_seq1         |
| comp16182_c0_seq1         | comp32060_c0_seq2         | comp43978_c0_seq16        | comp37480_c0_seq2         |
| comp44333_c0_seq1         | comp18445_c0_seq1         | comp43978_c0_seq10        | comp43142_c0_seq15        |
| comp38615_c1_seq1         | comp18445_c0_seq2         | comp35867_c0_seq3         | comp26984_c0_seq4         |
| comp42366_c0_seq4         | comp44552_c0_seq1         | comp42367_c0_seq5         | comp45004_c0_seq28        |
| comp19964_c0_seq1         | comp37453_c0_seq1         | comp41895_c0_seq2         | comp34393_c0_seq1         |
| comp44333_c0_seq2         | comp37453_c0_seq2         | comp29766_c0_seq3         | comp44822_c0_seq1         |
| comp44333_c0_seq5         | comp44491_c1_seq4         | comp29766_c0_seq1         | comp34174_c0_seq1         |
| comp43068_c0_seq7         | comp32014_c0_seq1         | comp44503_c1_seq1         | comp38968_c0_seq1         |
| comp34970_c4_seq6         | comp44002_c1_seq10        | comp29766_c0_seq2         | comp36559_c1_seq2         |
| comp45128_c1_seq2         | comp44900_c0_seq2         | comp45685_c0_seq1         | comp42879_c0_seq5         |
| comp27080_c0_seq1         | comp44900_c0_seq1         | comp41895_c0_seq5         | comp39992_c0_seq2         |
| comp38137_c0_seq1         | comp45289_c1_seq15        | comp40445_c12_seq1        | comp32662_c0_seq1         |
| comp32206_c0_seq1         | comp45289_c1_seq6         | comp40034_c1_seq1         | comp39992_c0_seq1         |
| comp39454_c0_seq2         | comp45075_c2_seq1         | comp43738_c2_seq1         | comp37294_c0_seq1         |
| comp30727_c3_seq1         | comp43177_c1_seq13        | comp43738_c11_seq1        | comp35135_c1_seq2         |
| comp38190_c0_seq2         | comp43177_c1_seq19        | comp45729_c0_seq2         | comp35135_c1_seq3         |
| comp42311_c1_seq2         | comp45075_c2_seq20        | comp41413_c0_seq2         | comp43939_c0_seq11        |
| comp40040_c0_seq2         | comp42996_c1_seq16        | comp45434_c0_seq2         | comp29946_c0_seq2         |
| comp41605_c2_seq1         | comp42996_c1_seq36        | comp44257_c0_seq2         | comp42881_c0_seq2         |
| comp29659_c0_seq1         | comp42996_c1_seq5         | comp44257_c0_seq3         | comp34649_c0_seq1         |
| comp33818_c0_seq1         |                           | comp30675_c0_seq1         | comp38901_c0_seq30        |
| comp43447_c0_seq1         |                           | comp27152_c0_seq2         | comp39120_c0_seq1         |
| comp37912_c0_seq1         |                           | comp27152_c0_seq1         | comp37786_c0_seq1         |
| comp40958_c1_seq1         |                           | comp44374_c1_seq1         | comp40958_c1_seq1         |
| comp32757_c0_seq1         |                           | comp41472_c0_seq8         | comp40815_c0_seq3         |
| comp20711_c0_seq1         |                           | comp43978_c0_seq22        | comp41667_c0_seq2         |
| comp37246_c0_seq2         |                           | comp43978_c0_seq19        | comp40687_c0_seq1         |
| comp39992_c0_seq2         |                           | comp43978_c0_seq23        |                           |
| comp37246_c0_seq1         |                           | comp43978_c0_seq13        |                           |
| comp39992_c0_seq1         |                           | comp45735_c0_seq2         |                           |
| comp41358_c0_seq5         |                           | comp45714_c0_seq2         |                           |

comp44007\_c0\_seq11  
comp33633\_c0\_seq1  
comp43806\_c1\_seq1  
comp33633\_c0\_seq3  
comp44007\_c0\_seq8  
comp42881\_c0\_seq14  
comp42881\_c0\_seq2  
comp37517\_c0\_seq1  
comp41358\_c0\_seq1  
comp44333\_c0\_seq6  
comp41818\_c0\_seq1  
comp30636\_c0\_seq2  
comp32687\_c1\_seq2  
comp44006\_c0\_seq2  
comp34492\_c1\_seq1  
comp35246\_c0\_seq2  
comp48823\_c0\_seq1  
comp44006\_c0\_seq1  
comp34728\_c0\_seq1  
comp45612\_c1\_seq1  
comp40820\_c1\_seq2  
comp40820\_c1\_seq3  
comp45610\_c0\_seq9  
comp45336\_c0\_seq6  
comp45336\_c0\_seq2  
comp44929\_c0\_seq1  
comp43623\_c0\_seq3  
comp43623\_c0\_seq6  
comp44069\_c0\_seq1  
comp36634\_c0\_seq3  
comp36634\_c0\_seq1  
comp36634\_c0\_seq2  
comp36634\_c0\_seq4  
comp39091\_c0\_seq1  
comp39091\_c0\_seq4  
comp45345\_c3\_seq1  
comp33448\_c1\_seq3  
comp41110\_c0\_seq2  
comp41110\_c0\_seq3

comp37936\_c1\_seq1  
comp34854\_c0\_seq1  
comp42367\_c0\_seq11  
comp45382\_c0\_seq2  
comp40445\_c33\_seq2  
comp34896\_c0\_seq3  
comp42439\_c0\_seq1  
comp40445\_c14\_seq1  
comp40445\_c15\_seq1  
comp35852\_c0\_seq1  
comp40445\_c33\_seq1  
comp42667\_c1\_seq3  
comp34970\_c4\_seq5  
comp35867\_c0\_seq1  
comp45687\_c1\_seq3  
comp45687\_c1\_seq5  
comp40782\_c0\_seq3  
comp44292\_c0\_seq55  
comp45590\_c0\_seq2  
comp45172\_c0\_seq1  
comp42878\_c0\_seq10  
comp37119\_c0\_seq3  
comp40782\_c0\_seq5  
comp43835\_c0\_seq1  
comp44292\_c0\_seq39  
comp42878\_c0\_seq3  
comp34322\_c0\_seq1  
comp42878\_c0\_seq6  
comp45572\_c1\_seq3  
comp44292\_c0\_seq30  
comp44292\_c0\_seq49  
comp44292\_c0\_seq7  
comp44292\_c0\_seq19  
comp45318\_c0\_seq9  
comp45318\_c0\_seq8  
comp67966\_c0\_seq1  
comp45262\_c1\_seq1  
comp44387\_c1\_seq6  
comp37789\_c1\_seq1  
comp37789\_c1\_seq2  
comp39831\_c0\_seq2  
comp39831\_c0\_seq3  
comp35075\_c0\_seq1  
comp7685\_c0\_seq1  
comp37143\_c0\_seq8  
comp42070\_c1\_seq5  
comp40250\_c0\_seq1  
comp34949\_c0\_seq5  
comp33757\_c0\_seq1  
comp45082\_c0\_seq2

comp33778\_c0\_seq1  
comp37379\_c0\_seq1  
comp92235\_c0\_seq1  
comp37749\_c0\_seq1  
comp35103\_c0\_seq1  
comp49574\_c0\_seq1  
comp16251\_c0\_seq1  
comp38024\_c0\_seq2

uncapped form but increased in capped form
