# Supplementary material
Source: PubMed Central journal article supplement (PMC5129703)
Supplement: supp_pp.16.00384_PP2016-00384R2_Supplemental_Table_S14.pdf [file supp_pp.16.00384_PP2016-00384R2_Supplemental_Table_S14.pdf]

1  
2  
3

**Table S14** Sequence-specific primers used for qRT-PCR.

| Unigene                                 |   | Primer sequence          |
|-----------------------------------------|---|--------------------------|
| <i>Primers for transcriptomic mRNAs</i> |   |                          |
| comp19260_c0_seq3                       | F | AGCACGAGGAGAAGCACGAG     |
|                                         | R | CCTTGGATTCTTCCTTGGACTC   |
| comp26205_c1_seq1                       | F | GTTCTCTCTTGCCGTCACTG     |
|                                         | R | GAGTAGTCCTTGTCCTTCTGG    |
| comp31921_c0_seq1                       | F | CAGTCATCAACTTGGCACATTC   |
|                                         | R | TGGTGTCCCTTGTTTCTCATCG   |
| comp34233_c0_seq1                       | F | GGTGGGCGGGTATTATGATG     |
|                                         | R | TTGATTAGTTCTCTGATGTGATGG |
| comp36901_c0_seq10                      | F | CGCTCCATCATCTTGTTCTTG    |
|                                         | R | TCGTCATTGCCACCTACTTC     |
| comp39255_c0_seq2                       | F | AATACGACAGGAAGTGGAAGC    |
|                                         | R | ACAGCCATCATAGCAGAAGC     |
| comp42302_c0_seq5                       | F | GCAGCCACAAGAAAGCAAATG    |
|                                         | R | ATCCAATCTCAATCGCAACCTC   |
| comp42344_c2_seq2                       | F | TTGACAGTTATATGATTCCAGAGG |
|                                         | R | GCATTTGATTCCGAGAGACG     |
| comp43374_c0_seq5                       | F | TCTCTCTTCTTTGCCTCTTACG   |
|                                         | R | GCTCTGCCCTCATTTCCTTC     |
| comp44333_c0_seq5                       | F | AGTTGAGTTTCGCCTTTGTTC    |
|                                         | R | ATATAGAGGAGTAAGACAGAGACC |
| comp44806_c0_seq4                       | F | ATACTAAGGCTTCTCTCCAG     |
|                                         | R | CAGGTTCCACATTCACATCC     |
| comp45586_c1_seq22                      | F | GGGCTCCATAAAACAACCTGTG   |
|                                         | R | GACCAACGCTCCTTTCATCC     |
| comp39360_c0_seq1                       | F | CCAGGAACAAGTAGCCTCATG    |

---

|                   |   |                        |
|-------------------|---|------------------------|
|                   | R | AGATCGTCTTGTACCTGTGG   |
| comp37945_c0_seq1 | F | TTGCCATTCTATGCAAATCTG  |
|                   | R | TTTGATAAAACCTCCGGGGC   |
| comp40958_c1_seq1 | F | TATAACAAGTCACCAGAGGC   |
|                   | R | CTCGCCCAGATTTTCGGAA    |
| comp43854_c0_seq2 | F | GCTAAAATCGAGAATGGCACGT |
|                   | R | TTCCCCACTTGCCAAGCAA    |
| comp35259_c0_seq1 | F | GAATCCCAGTCATAACCCATTG |
|                   | R | CGTGCCTGTGGTATGTACAGA  |
| comp36234_c2_seq1 | F | ACAATGGTAGGACAGTTGCTC  |
|                   | R | AGGTTTGGTTGAGGATTCGAG  |
| comp21546_c0_seq1 | F | ATTGTCGGGCTGTACAAATCTC |
|                   | R | CTTCAACGTTCAAGTTTGGCAT |
| Tobacco Tublin    | F | ATGAGAGAGTGCATATCGAT   |
|                   | R | TTCACTGAAGAAGGTGTTGAA  |

*Primers for mature miRNAs*

|             |   |                        |
|-------------|---|------------------------|
| cln-miR1535 | F | CTTGTTTGTGGTGATGTCTAG  |
| cln-miR156a | F | TGACAGAAGAGAGAGAGCACA  |
| cln-miR159  | F | ATTGGTTTGAAGGGAGCTCC   |
| cln-miR162  | F | TTGATAAACCTCTGCATCCAG  |
| cln-miR164  | F | TGGAGAAGCAGGGCACGT     |
| cln-miR166a | F | CTCGGACCAGGCTTCATTC    |
| cln-miR166b | F | TCGGACCAGGCTTCATTCC    |
| cln-miR168  | F | CTTGGTGCAGGTCGGGAA     |
| cln-miR169b | F | CAGCCAAGAATGACTTGCCG   |
| cln-miR169c | F | GAGCCAAGGATGACTTGC     |
| cln-miR169d | F | GGCAAGTTGTCCTTGGCTAC   |
| cln-miR169e | F | TAGCCAAGGATGACTTGCCTGC |
| cln-miR171b | F | TTGAGCCGCGCCAATATCT    |

---

---

|                                                                                    |   |                                   |
|------------------------------------------------------------------------------------|---|-----------------------------------|
| cln-miR196                                                                         | F | TTCCACGGCTTTCTTGA ACTT            |
| cln-miR390                                                                         | F | AAGCTCAGGAGGGATAGCG               |
| cln-miR393                                                                         | F | CATCCAAAGGGATCGCATTGA             |
| cln-miR395                                                                         | F | ATGAAGTGTTTGGAGGAACTC             |
| cln-miR396a                                                                        | F | GTTCAATAAAGCTGTGGG                |
| cln-miR529                                                                         | F | AGAAGAGAGAGAGTACAGCCC             |
| miRNA (for all)                                                                    | R | CGTCGAGCATTGAAATTTCTAGA           |
| 5.8sRNA                                                                            | F | ACGTCTGCCTGGGTGTCACAA             |
|                                                                                    | R | GCGAGCACAGAATTAATACGAC            |
| <i>Primers used to amplify gene fragments in the transient co-expression assay</i> |   |                                   |
| comp35259_c0_seq1                                                                  | F | CGAGGTACCCTTCAAGACTGCAAGGCGG      |
|                                                                                    | R | GACGGATCCCACAACATTCTGCCTCAGACT    |
| comp36234_c2_seq1                                                                  | F | CGAGGTACCGCAACAGCAGCAGTTTCTG      |
|                                                                                    | R | CGAGGATCCCAGGTGCATTTCAACTGAATCC   |
| comp21546_c0_seq1                                                                  | F | CGAGGTACCCAGTTGATTGGTTTGTATGGCAAG |
|                                                                                    | R | CGAGGATCCCTAGCAAGAACCTGCCAC       |
| cln-miR159                                                                         | F | CGAGGTACCGGATGGAGCAGGAGGAGAGA     |
|                                                                                    | R | GACGGATCCAGTTGGAGCTCCCTTCAAGC     |
| cln-miR171b                                                                        | F | CGAGGTACCGTTGGAGGTTTGGTTGAGGA     |
|                                                                                    | R | CGAGGATCCACAGGCGATATTGGCGCGGC     |
| cln-miR393                                                                         | F | CGAGGTACCCTTTCAAATTGATCCCTTTC     |
|                                                                                    | R | CGAGGATCCGAATCAATGCGATCCCTTTG     |

---

4

6
