# Supplementary material
Source: PubMed Central journal article supplement (PMC5129703)

1 **Supplemental Figure S10**

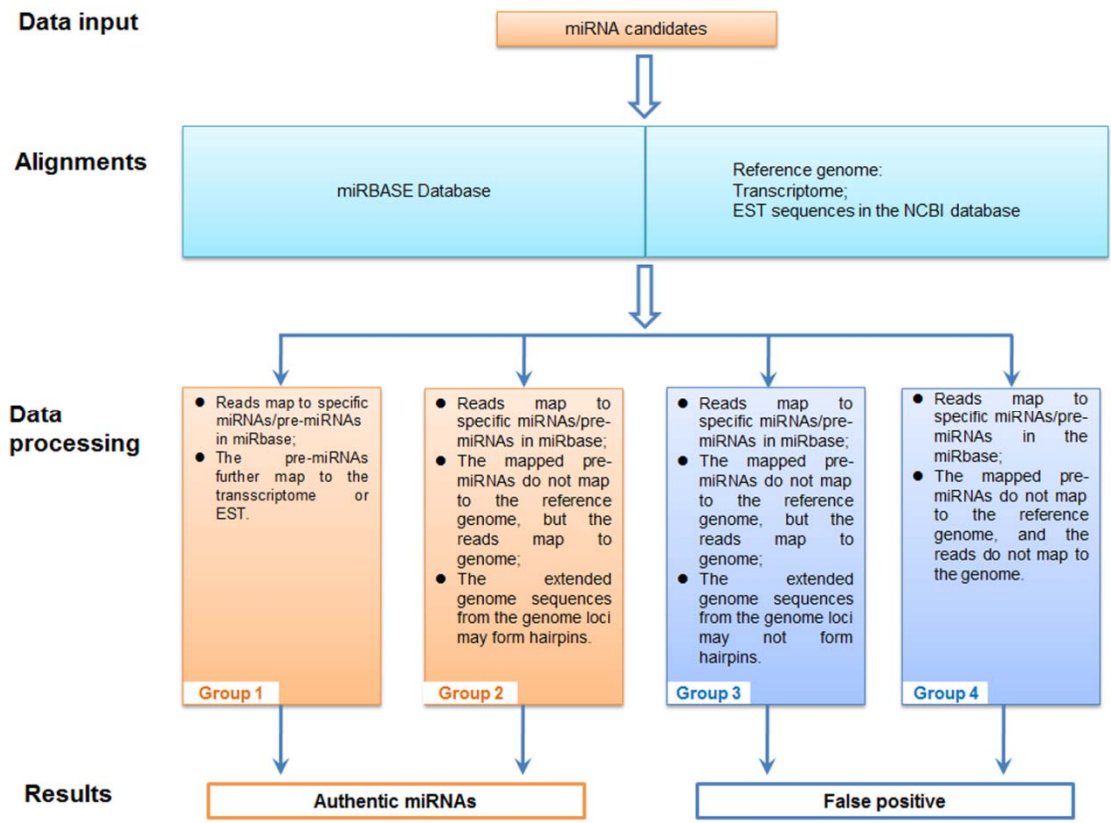

2

3 **Fig. S10 The workflow of the ACGT101-miR pipeline.**

4

Supplement: supp_pp.16.00384_PP2016-00384R2_Supplemental_Figure_S10.pdf [file supp_pp.16.00384_PP2016-00384R2_Supplemental_Figure_S10.pdf]

1 Supplemental Figure S2

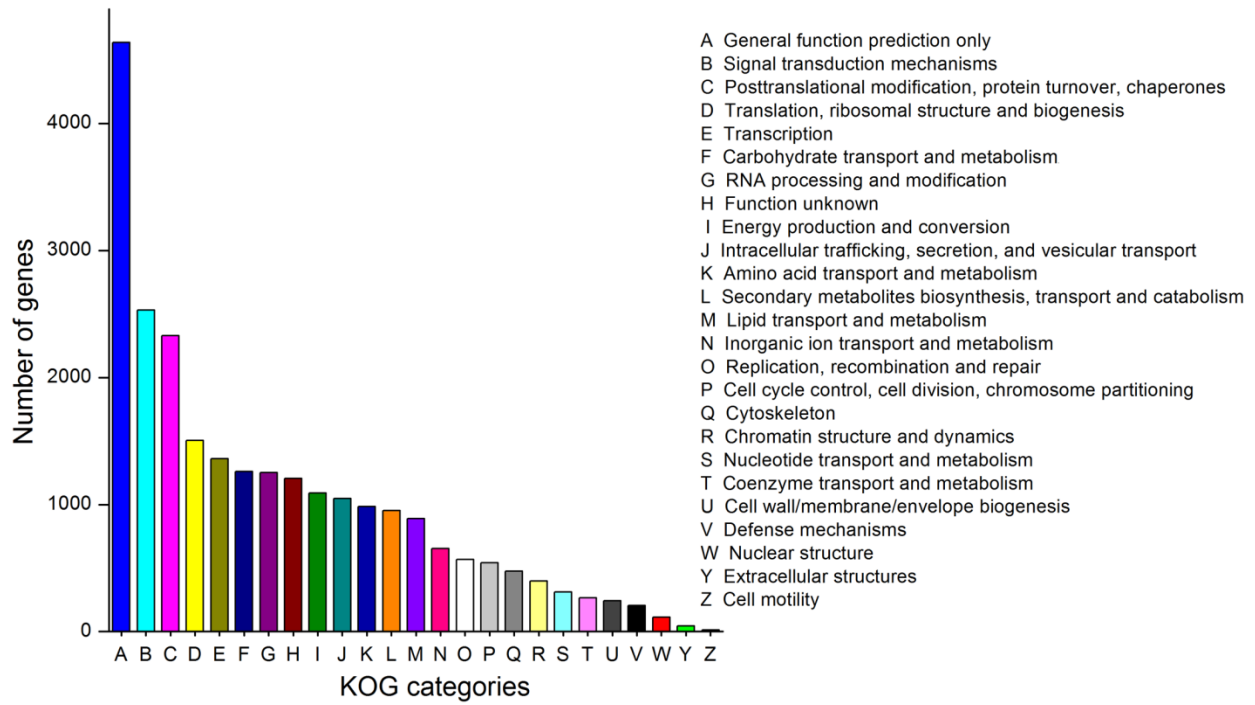

2

3 Fig. S2 Eukaryotic Ortholog Groups (KOG) categories of the transcriptome.

4

Supplement: supp_pp.16.00384_PP2016-00384R2_Supplemental_Figure_S2.pdf [file supp_pp.16.00384_PP2016-00384R2_Supplemental_Figure_S2.pdf]

1 Supplemental Figure S4

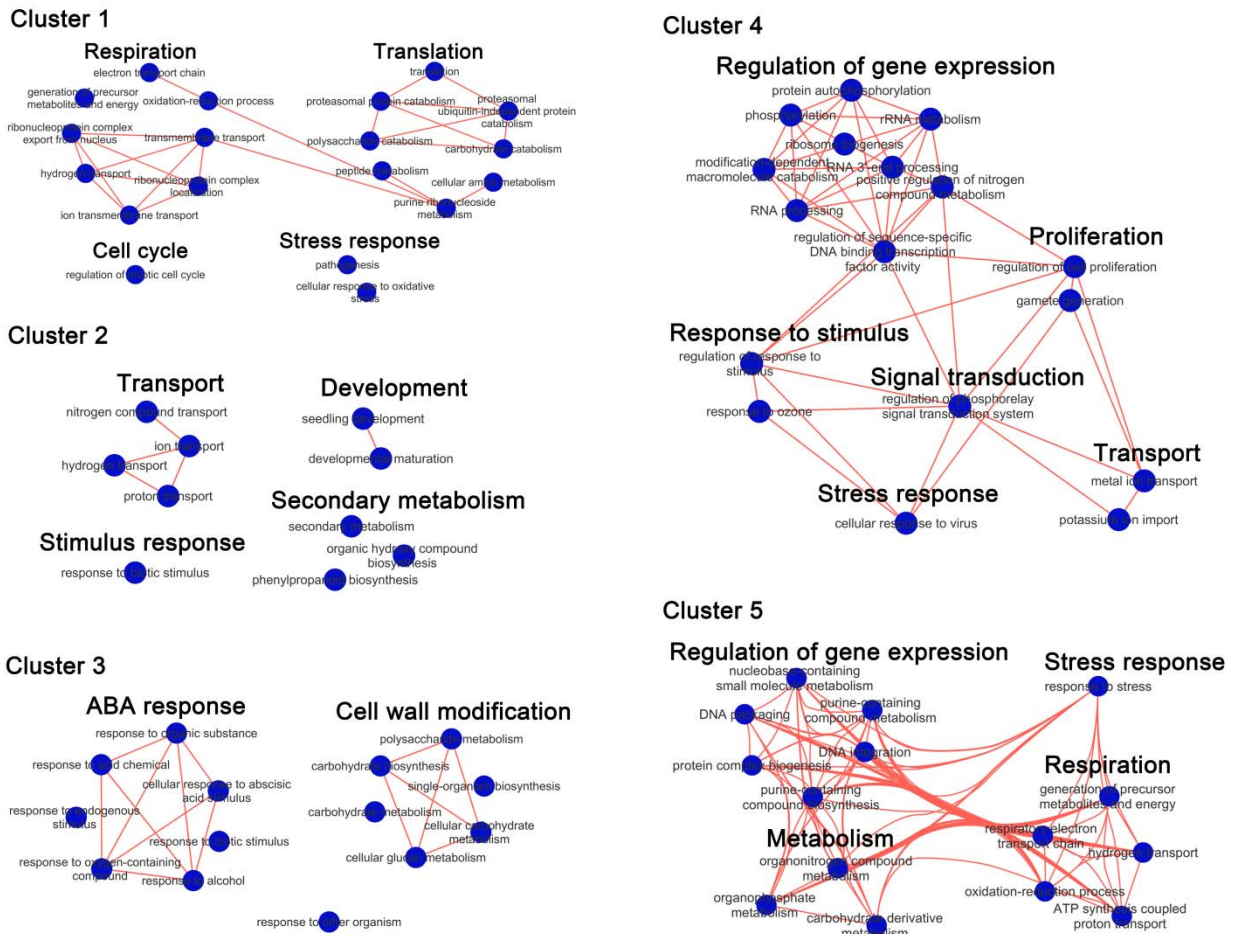

2  
3 Fig. S4 Enriched GO (BP) terms for the five gene clusters.

Supplement: supp_pp.16.00384_PP2016-00384R2_Supplemental_Figure_S4.pdf [file supp_pp.16.00384_PP2016-00384R2_Supplemental_Figure_S4.pdf]
